# Supplementary material for: Association Between Refractive Errors and Positive Scoliosis Screening Results: A Cross-Sectional Study of 101,404 School-Aged Children
Source: Research Square preprint supplement (doi:10.21203/rs.3.rs-7666808/v1), 2025-10-12
Supplement: Supplementary file 1 [file 1db6e8dee5b929be43485ec8.docx]

**Association Between Refractive Errors and Positive Scoliosis Screening Results: A Cross-Sectional Study of 101,404 School-Aged Children**

| Characteristic | With Spinal kyphosis (n = 386) | Contorl (n = 85429) | p value |
| --- | --- | --- | --- |
| Age(years) | 12.60 ±2.44 | 10.73 ±2.91 | 0.000 |
| BMI(kg/m2) | 18.78 ±3.66 | 18.33±4.59 | 0.003 |
| Sex,n |  |  | 0.000 |
| Male | 144 | 46101 |  |
| Female | 242 | 39328 |  |
| Use of Corrective Lenses ,n |  |  | 0.022 |
| No | 311 | 72427 |  |
| Yes | 75 | 13002 |  |
| Myopia, n |  |  | 0.000 |
| SE>-0.50 D in both eyes | 72 | 31028 |  |
| -3.00D<SE<=-0.50 D in one or two eyes | 170 | 34071 |  |
| -6.00D<SE<=-3.00 D in one or two eyes | 120 | 17140 |  |
| SE<=-6.00D in one or two eyes | 24 | 3190 |  |
| Hyperopia, n |  |  | 0.000 |
| SE<0.50 D in both eyes | 339 | 64926 |  |
| 0.50D<=SE<2.00D in one or two eyes | 37 | 15462 |  |
| 0.50D<=SE<5.00D in one or two eyes | 6 | 3010 |  |
| SE>5.00D in one or two eyes | 4 | 2031 |  |
| Astigmatism, n |  |  | 0.604 |
| |Cylinder|<1.00D in both eyes | 307 | 67472 |  |
| 1.00D<=|Cylinder|<2.00 D in one or two eyes | 57 | 13990 |  |
| 1.00D<=|Cylinder|<3.00 D in one or two eyes | 16 | 2687 |  |
| |Cylinder|>=3.00D in one or two eyes | 6 | 1280 |  |
| Anisometropia, n |  |  | 0.000 |
| SE difference<1.00D | 277 | 67278 |  |
| 1.00D<=SE difference<2.00D | 61 | 12533 |  |
| 2.00D<=SE difference<3.00D | 31 | 3498 |  |
| SE difference>=3.0D | 17 | 2120 |  |

Table 1Characteristics of participants with positive kyphosis screening and control groups.

.

| Characteristic | Univariate analysis | | | Multivariate analysis | | |
| --- | --- | --- | --- | --- | --- | --- |
| Crude OR | 95% CI | p value | Adjusted OR | 95% CI | p value |
| Age | 1.265 | 1.218-1.315 | 0.000 | 1.283 | 1.223-1.345 | 0.000 |
| BMI | 1.014 | 1.000-1.027 | 0.048 | 0.947 | 0.918-0.977 | 0.001 |
| Sex |  |  |  |  |  |  |
| Male | Reference |  |  | Reference |  |  |
| Female | 1.970 | 1.602-2.422 | 0.000 | 1.908 | 1.550-2.348 | 0.000 |
| Use of Corrective Lenses |  |  |  |  |  |  |
| No | Reference |  |  |  |  |  |
| Yes | 1.343 | 1.043-1.730 | 0.022 | 1.195 | 0.927-1.541 | 0.170 |
| Myopia |  |  |  |  |  |  |
| SE>-0.50 D in both eyes | Reference |  |  | Reference |  |  |
| -3.00D<SE<=-0.50 D in one or two eyes | 2.150 | 1.632-2.834 | 0.000 | 1.085 | 0.760-1.524 | 0.678 |
| -6.00D<SE<=-3.00 D in one or two eyes | 3.017 | 2.251-4.043 | 0.000 | 1.098 | 0.713-1.565 | 0.786 |
| SE<=-6.00D in one or two eyes | 3.242 | 2.040-5.153 | 0.000 | 0.987 | 0.572-1.702 | 0.962 |
| Hyperopia, |  |  |  |  |  |  |
| SE<0.50 D in both eyes | Reference |  |  | Reference |  |  |
| 0.50D<=SE<2.00D in one or two eyes | 0.458 | 0.326-0.644 | 0.000 | 0.799 | 0.531-1.203 | 0.282 |
| 2.00D<=SE<5.00D in one or two eyes | 0.382 | 0.170-0.856 | 0.020 | 0.506 | 0.214-1.194 | 0.120 |
| SE>5.00D in one or two eyes | 0.377 | 0.141-1.012 | 0.053 | 0.751 | 0.267-2.107 | 0.586 |
| Astigmatism |  |  |  |  |  |  |
| |Cylinder|<1.00D in both eyes | Reference |  |  | Reference |  |  |
| 1.00D<=|Cylinder|<2.00 D in one or two eyes | 0.895 | 0.675-1.189 | 0.445 |  |  |  |
| 2.00D<=|Cylinder|<3.00 D in one or two eyes | 1.309 | 0.791-2.166 | 0.296 |  |  |  |
| |Cylinder|>=3.00D in one or two eyes | 1.030 | 0.458-2.315 | 0.943 |  |  |  |
| Anisometropia |  |  |  |  |  |  |
| SE difference<1.00D | Reference |  |  | Reference |  |  |
| 1.00D<=SE difference<2.00D | 1.182 | 0.895-1.561 | 0.238 | 0.917 | 0.690-1.220 | 0.553 |
| 2.00D<=SE difference<3.00D | 2.152 | 1.483-3.125 | 0.000 | 1.600 | 1.089-2.351 | 0.017 |
| SE difference>=3.0D | 1.948 | 1.191-3.184 | 0.008 | 1.602 | 0.955-2.689 | 0.074 |

Table 2 Univariate and multivariate logistic regression analysis of factors associated with a positive kyphosis screening.

**Supplementary Material**

# **National Standard of the People's Republic of China**

## **GB/T 16133-2014**

## **Screening of Spinal Curvature Abnormality for Children and Adolescents**

### **1. Scope**

This standard specifies the principles, examination methods, and result statistics for the screening of spinal curvature abnormalities in children and adolescents.

This standard is applicable to the screening of spinal curvature abnormalities during health examinations and health monitoring for children and adolescents aged 6 to 18 years. It may be used as a reference for the spinal health examination of preschool children and young adults.

### **2. Terminology and Definitions**

The following terms and definitions apply to this document.

2.1 Spinal Curvature Abnormality

A condition where the curvature of the spine exceeds the normal physiological range.

2.2 Scoliosis

A three-dimensional spinal deformity characterized by a lateral curvature of one or more segments of the spine, accompanied by vertebral rotation.

Note: The Scoliosis Research Society quantifies this as a Cobb angle greater than 10° measured on a standing anteroposterior X-ray.

2.3 Postural Scoliosis

A lateral spinal curvature abnormality closely related to prolonged sitting (especially with improper posture) and lack of physical activity.

2.4 Idiopathic Scoliosis

A type of scoliosis with an unknown cause.

Note: This is the most common type of structural scoliosis.

2.5 Postural Kyphosis (Humpback)

Excessive posterior curvature of the spine due to poor posture during developmental stages.

Note: Also known as postural humpback or habitual kyphosis, most common in the thoracic spine.

2.6 Structural Kyphosis

A fixed posterior curvature of the spine due to structural changes.

2.7 Disease-related Scoliosis or Kyphosis

Scoliosis or kyphosis caused by certain diseases.

Note: Can be congenital or acquired. Common causes in children and adolescents include spinal tuberculosis, rickets, trauma, sequelae of poliomyelitis, and leg length discrepancy.

### **3. Screening Principles**

The primary objective is to screen for and identify postural scoliosis and postural kyphosis, distinguishing them from normal spinal alignment and other types of spinal curvature abnormalities.

### **4. Examination Methods**

#### **4.1 Scoliosis Examination**

4.1.1 General Inspection

The subject stands in an erect, relaxed position with their back to the examiner, unclothed from the waist up. The examiner checks for:

a) Equality of shoulder height.

b) Symmetry of the scapulae on both sides of the spine and equality of the height of their inferior angles.

c) Symmetry of the waist creases.

d) Deviation of the spinous process line from the midline.

4.1.2 Forward Bend Test (Adam's Test)

In a well-lit area, the examiner faces the subject's exposed back. The subject is instructed to stand with knees straight and feet together, extend their arms with palms together, and slowly bend forward at the waist to approximately 90°. The clasped hands should be gradually brought between the knees. The examiner's eyes must remain parallel to the subject's back, observing from the head to the sacrum and from the thoracic to the lumbar region for any unevenness. Any asymmetry on the back (e.g., a unilateral rib hump or muscle prominence) constitutes a positive Forward Bend Test, indicating suspected scoliosis.

4.1.3 Spinal Mobility Test

If scoliosis is suspected during the general inspection but the Forward Bend Test is negative, the subject is asked to slowly perform spinal flexion, extension, left and right lateral bending, and left and right rotation, each twice. Afterward, the subject returns to an erect posture, and the examiner re-inspects the spine for any persistent lateral deviation.

4.1.4 Prone Test

If scoliosis is suspected after the general inspection, Forward Bend Test, and Spinal Mobility Test, the subject lies flat on their stomach (prone) on an examination table and relaxes. The examiner observes if the line of spinous processes returns to the midline and if the previously noted curvature completely disappears.

4.1.5 Scoliometer Examination

Using a scoliometer (designed by American scholar Bunnell), the examiner measures the subject's back during the Forward Bend Test. Measurements are taken at different segments (thoracic, thoracolumbar, lumbar), and the maximum angle of trunk rotation (ATR) and its location are recorded. An ATR measurement exceeding 5° at the point of greatest asymmetry is considered highly suspicious for scoliosis. The magnitude of the ATR is correlated with the severity of scoliosis, and an angle >5° includes almost all cases of scoliosis with a Cobb angle >10°.

4.1.6 Assessment of Results

The assessment criteria for scoliosis are detailed in Table 1.

**Table 1. Assessment Criteria for Scoliosis**

| Scoliosis Type | Assessment Criteria |
| --- | --- |
| **No Scoliosis** | No abnormal findings on both General Inspection and Forward Bend Test; OR positive findings on General Inspection but negative Forward Bend Test and negative Spinal Mobility Test; OR no abnormalities on General Inspection and Forward Bend Test with a scoliometer reading of <5°. |
| **Scoliosis Grade I** | Positive findings on General Inspection and Forward Bend Test, but the curvature completely disappears in the Prone Test; OR positive General Inspection, negative Forward Bend Test, but curvature persists on Spinal Mobility Test, yet disappears in the Prone Test; OR positive General Inspection and Forward Bend Test with a scoliometer reading of 5° ≤ ATR < 7°. |
| **Scoliosis Grade II** | Positive findings on General Inspection and Forward Bend Test, and the curvature does not completely disappear in the Prone Test; OR positive General Inspection and a clearly abnormal Forward Bend Test, with a scoliometer reading of 7° ≤ ATR < 10°. |
| **Scoliosis Grade III** | Positive findings on General Inspection, a significantly abnormal Forward Bend Test with associated thoracic cage deformity, some loss of functional capacity, AND a scoliometer reading of ≥10°. |

*Note: Postural scoliosis is generally limited to Grade I. Idiopathic and disease-related scoliosis can present as Grade II or III. Grade I idiopathic scoliosis is indistinguishable from postural scoliosis during screening and may be temporarily classified as such.*

4.1.7 Recording of Results

For postural scoliosis, record the location, direction, and grade of the curve. Location is classified as upper thoracic, thoracic, thoracolumbar, or lumbar. Direction is classified as left or right convexity.

#### **4.2 Examination for Anteroposterior Curvature Abnormalities**

4.2.1 General Inspection

The subject stands in an erect position, viewed from the side by the examiner. In a normal posture, the external auditory canal, acromion, and greater trochanter are aligned on the same vertical plane.

- **Suspected Hyperkyphosis:** If the external auditory canal is anterior to this vertical line, and the thoracic curve is increased (presenting as a sunken chest, forward head/neck posture, and protracted abdomen), an abnormal kyphosis is suspected.
- **Suspected Hyperlordosis:** If the external auditory canal is posterior to this vertical line, and the lumbar curve is excessively increased (presenting as a prominent abdomen, deepened lower back curve, and prominent buttocks), an abnormal lordosis is suspected.

4.2.2 Prone Test

If an anteroposterior curvature abnormality is suspected, the subject lies prone on an examination table and relaxes. The examiner observes if the kyphosis or lordosis completely disappears.

4.2.3 Assessment of Results

The assessment criteria for anteroposterior curvature abnormalities are detailed in Table 2.

**Table 2. Assessment Criteria for Anteroposterior Curvature Abnormalities**

| Curvature Type | Assessment Criteria |
| --- | --- |
| **No Abnormality** | No abnormal findings on General Inspection and Prone Test. A straight back in young children is considered normal. |
| **Lordosis Abnormality** | Positive findings for hyperlordosis on General Inspection. |
| **Kyphosis Abnormality** | Positive findings for hyperkyphosis on General Inspection. If the kyphosis completely disappears in the Prone Test, it is classified as **Kyphosis Grade I**. If it does not completely disappear, it is **Kyphosis Grade II**. Kyphosis combined with thoracic deformity and some loss of functional capacity is **Kyphosis Grade III**. |

*Note: Postural kyphosis is typically Grade I but can reach Grade II. Structural kyphosis is often Grade II or III.*

### **Appendix A (Informative)**

**Additional Considerations for Spinal Curvature Abnormality Examination**

A.1 The following points are helpful for initial screening:

a) Inquire about medical history.

b) From the front, inspect the thoracic cage for any deformity and asymmetry.

c) Check for paralysis, muscle atrophy, or disability in the upper and lower limbs.

d) Check if the iliac crests and greater trochanters are at the same height.

e) Examine the spine for any tenderness or other abnormal signs, and assess for any limitation in movement.

**A.2** For further screening of spinal curvature abnormalities, referral for specialist examination is recommended, including Moiré topography and standing full-spine X-rays. A detailed neurological examination may be necessary.

**A.3** For subjects with leg length discrepancy, the Forward Bend Test can be performed in a seated position.
